# Supplementary figures and images for: Cellular uptake of polylactide particles induces size dependent cytoskeletal remodeling in antigen presenting cells
Source: Royal Society of Chemistry journal article supplement (doi:10.1039/d1bm01312b), 2021-01-01

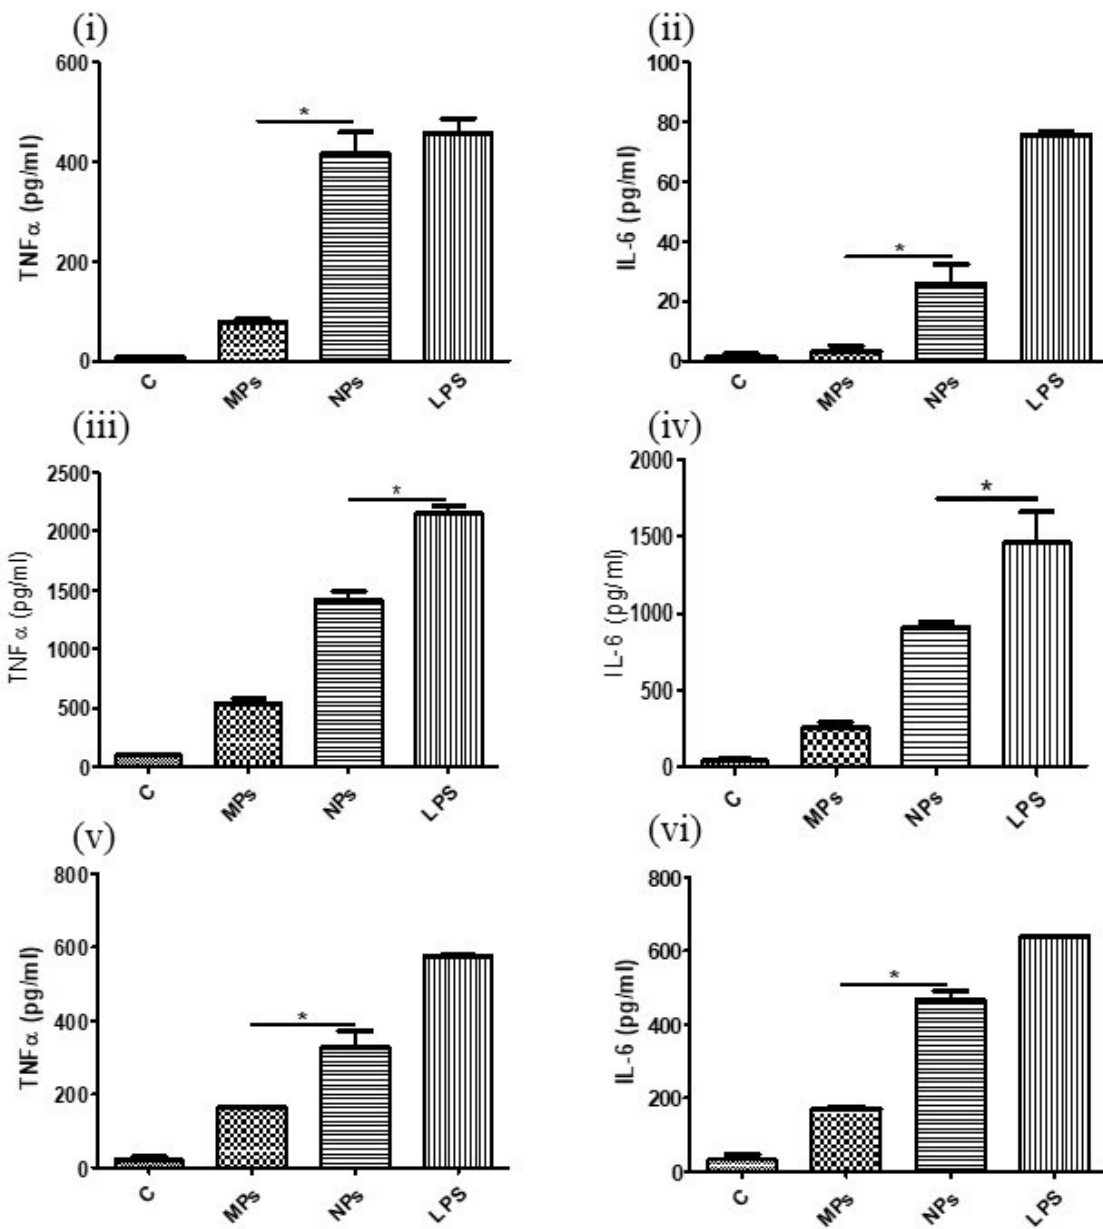

Supplement: d1bm01312b1.pdf [file d1bm01312b1.pdf]

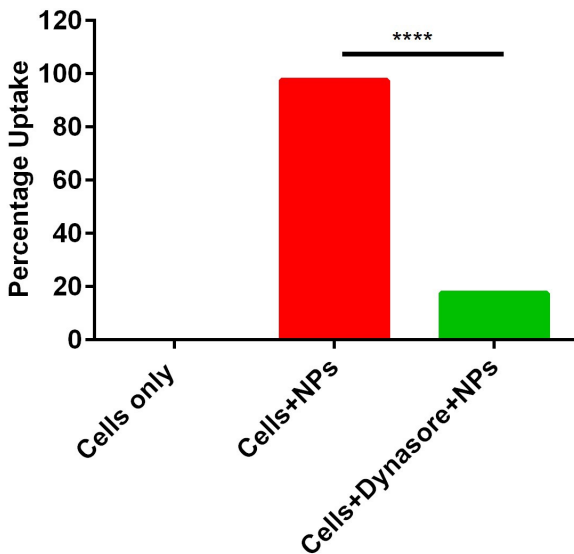

Supplement: d1bm01312b2.pdf [file d1bm01312b2.pdf]
